# Supplementary figures and images for: Nanoporous fibers of type-I collagen coated poly(l-lactic acid) for enhancing primary hepatocyte growth and function
Source: Royal Society of Chemistry journal article supplement (doi:10.1039/c2tb00195k), 2012-11-05

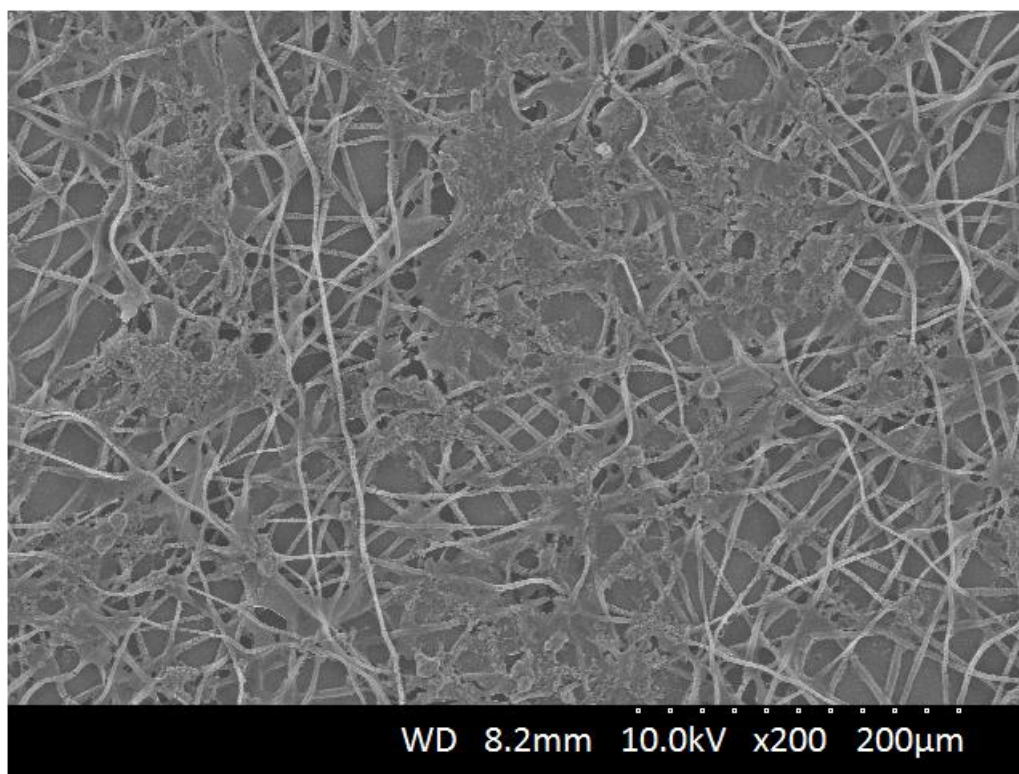

**Figure S1.** The large hepatocyte monolayers on nPFs after 15 days in culture.

Supplement: c2tb00195k.pdf [file c2tb00195k.pdf]
